# Supplementary material for: Associations of plasma hepcidin with mortality risk in patients with coronary artery disease
Source: PubMed Central journal article supplement (PMC5752537; doi:10.18632/oncotarget.22722), 2017-11-27
Supplement: oncotarget-08-109497-s001.pdf [file oncotarget-08-109497-s001.pdf]

# Associations of plasma hepcidin with mortality risk in patients with coronary artery disease

## SUPPLEMENTARY MATERIALS

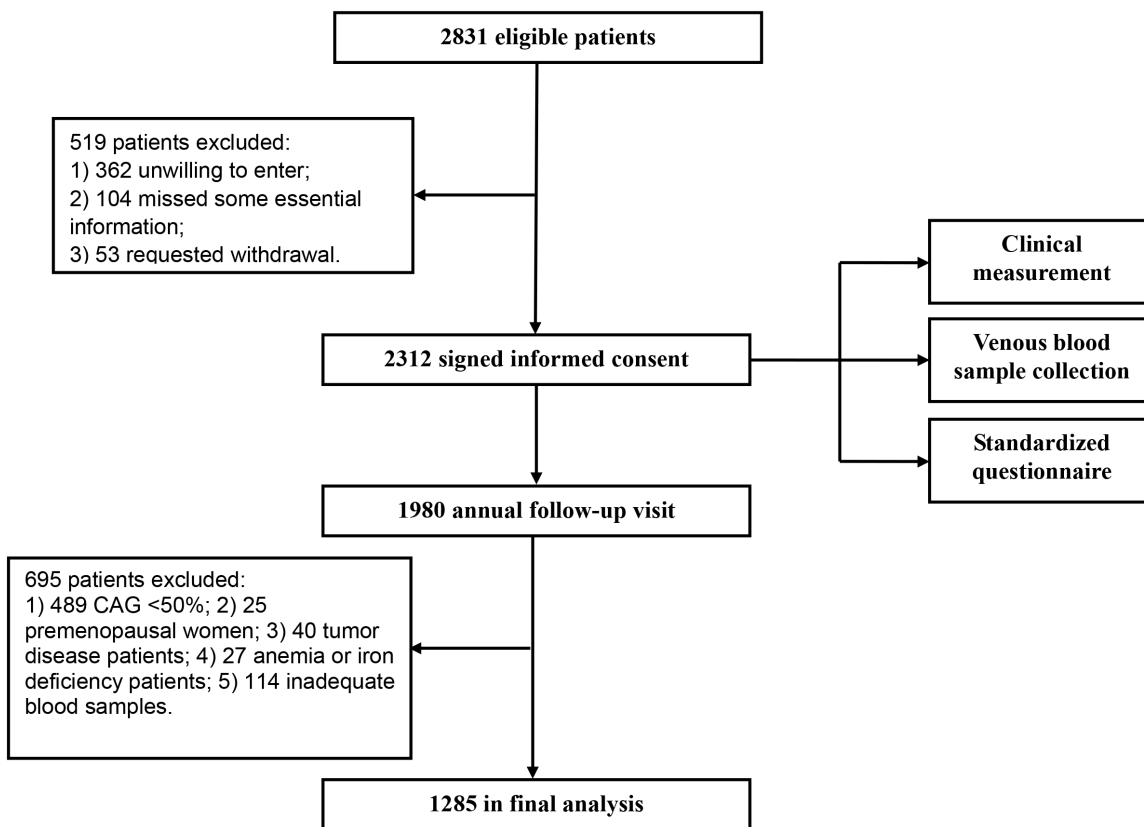

Supplementary Figure 1: Flow chart illustrating the recruitment of the patients for the study.

Supplementary Table 1: Correlation coefficients between markers

|                                | IL-6   | Ferritin | Hepcidin |
|--------------------------------|--------|----------|----------|
| Total Samples                  |        |          |          |
| C-reactive protein             | 0.293* | 0.278*   | 0.302*   |
| Interleukin-6                  |        | 0.131*   | 0.121*   |
| Ferritin                       |        |          | 0.873*   |
| Acute coronary syndrome        |        |          |          |
| C-reactive protein             | 0.335* | 0.205*   | 0.255*   |
| Interleukin-6                  |        | 0.094*   | 0.096    |
| Ferritin                       |        |          | 0.845*   |
| Stable coronary artery disease |        |          |          |
| C-reactive protein             | 0.229* | 0.211*   | 0.275*   |
| Interleukin-6                  |        | 0.128*   | 0.131*   |
| Ferritin                       |        |          | 0.831*   |

\*  $P < 0.05$ .
